# Supplementary material for: Integrated Analysis of Transcriptome and Metabolome and Evaluation of Antioxidant Activities in Lavandula pubescens
Source: MDPI journal article supplement (doi:10.3390/antiox10071027), 2021-06-25
Supplement: s1 [file s1]

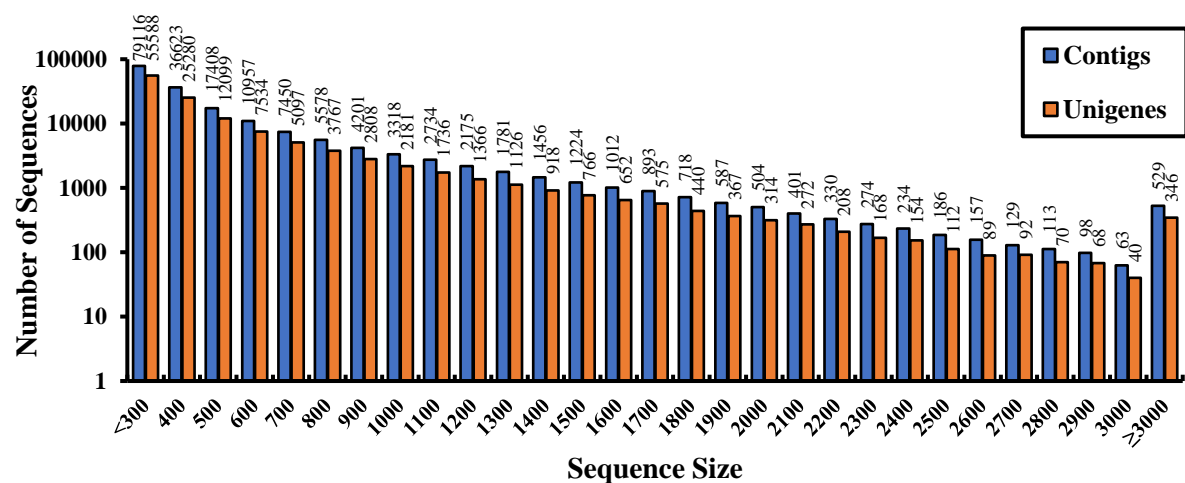

**Figure S1.** Length distribution of contigs and unigenes in the *Lavandula pubescens* transcriptome.

|   |      |                                                                    |
|---|------|--------------------------------------------------------------------|
| A | 17   | RNA processing and modification                                    |
| B | 38   | Chromatin Structure and dynamics                                   |
| C | 874  | Energy production and conversion                                   |
| D | 192  | Cell cycle control, cell division, chromosome partitioning         |
| E | 968  | Amino acid transport and metabolism                                |
| F | 371  | Nucleotide transport and metabolism                                |
| G | 1590 | Carbohydrate transport and metabolism                              |
| H | 616  | Coenzyme transport and metabolism                                  |
| I | 852  | Lipid transport and metabolism                                     |
| J | 1799 | Translation, ribosomal structure and biogenesis                    |
| K | 795  | Transcription                                                      |
| L | 601  | Replication, recombination and repair                              |
| M | 725  | Cell wall/membrane/envelope biogenesis                             |
| N | 90   | Cell motility                                                      |
| O | 1464 | Post-translational modification, protein turnover, chaperones      |
| P | 621  | Inorganic ion transport and metabolism                             |
| Q | 593  | Secondary metabolite biosynthesis, transport and catabolism        |
| R | 1441 | General functional prediction only                                 |
| S | 339  | Function unknown                                                   |
| T | 1330 | Signal transduction mechanisms                                     |
| U | 96   | Intracellular trafficking, secretion, and vesicular transport      |
| V | 272  | Defense mechanisms                                                 |
| W | 3    | Extracellular structures                                           |
| X | 129  | Phage-derived proteins, transposases and other mobilome components |
| Y | 0    | Nuclear structure                                                  |
| Z | 22   | Cytoskeleton                                                       |

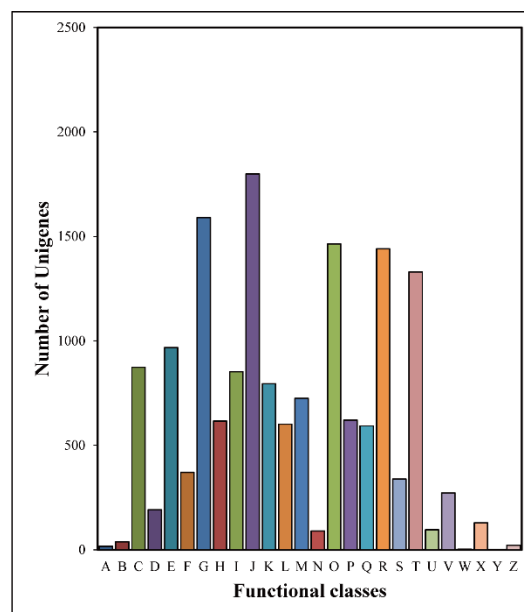

**Figure S2.** COG functional classification of the *Lavandula pubescens* unigenes.

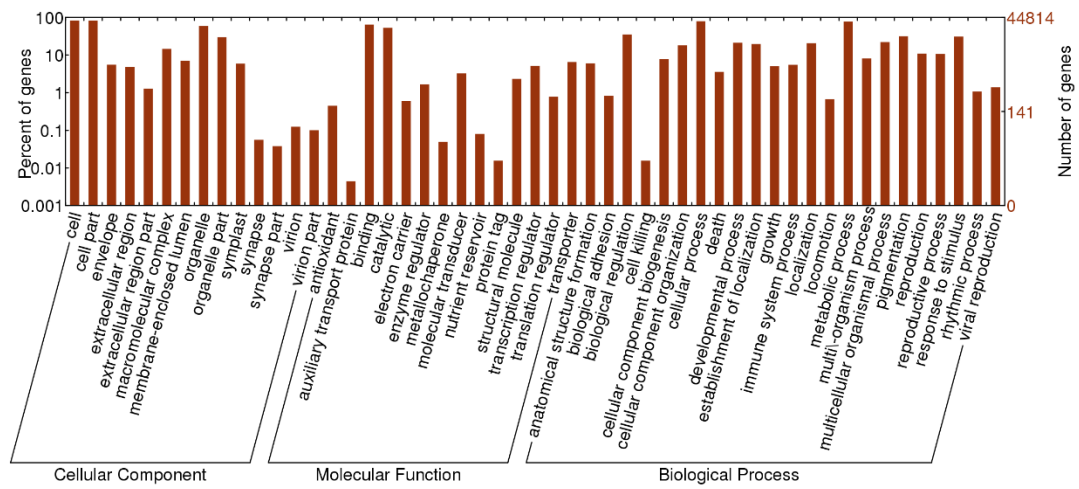

Figure S3. GO annotation of the *Lavandula pubescens* unigenes.

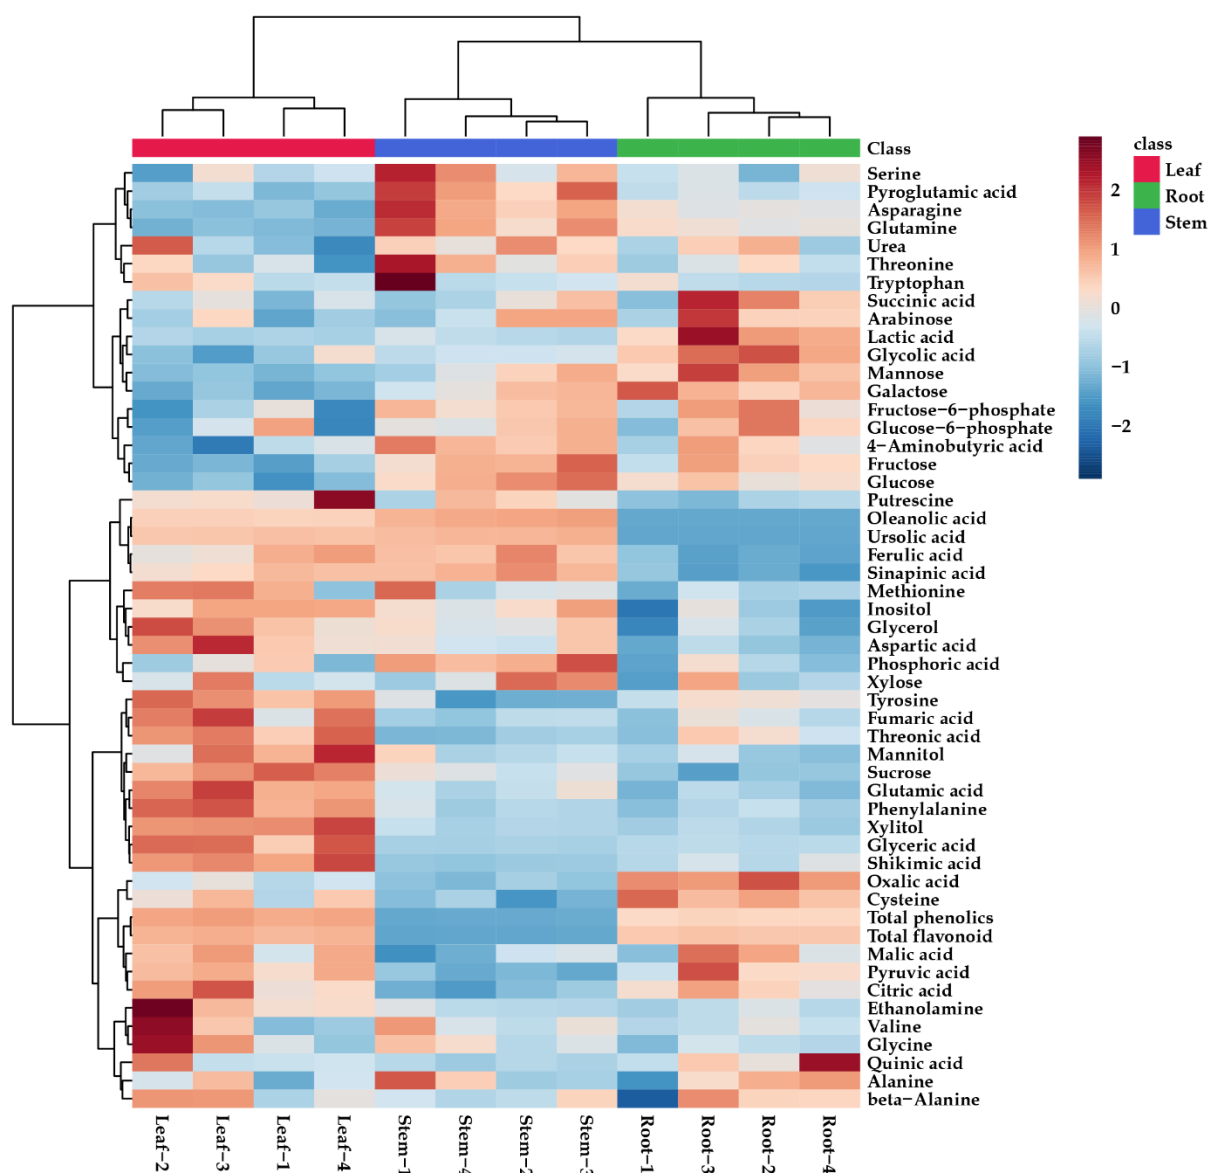

**Figure S4.** Heatmap representing differences in relative metabolite concentrations of roots, leaves, and stems of *Lavandula pubescens*. Increasing and decreasing the contents of metabolites are shown by red and blue color, respectively.

**Table S1.** Summary of unigenes in the *Lavandula pubescens*

|                                 | Raw reads     | Contigs    | Unigenes   |
|---------------------------------|---------------|------------|------------|
| Total length (bp <sup>1</sup> ) | 9,476,122,928 | 86,598,482 | 58,431,429 |
| Number of sequences             | 124,685,828   | 180,249    | 124,233    |
| Average length (bp)             | 76            | 480        | 470        |
| Median length (bp)              | 76            | 322        | 319        |
| Maximum length (bp)             | 76            | 11,308     | 11,308     |
| Minimum length (bp)             | 76            | 224        | 224        |
| N50 (bp)                        | 76            | 545        | 522        |

<sup>1</sup>bp, basepair

**Table S2.** Summary of the annotation of *Lavandula pubescens* unigenes

|                                     | Number of BLASTed unigenes | Ratio (%) |
|-------------------------------------|----------------------------|-----------|
| All unigenes                        | 124,233                    | 100       |
| Unigenes BLASTed against Nr         | 64,993                     | 52.32     |
| Unigenes BLASTed against Nt         | 20,947                     | 16.86     |
| Unigenes BLASTed against SWISS-PROT | 45,750                     | 36.83     |
| Unigenes BLASTed against BRAD       | 57,951                     | 46.65     |
| Unigenes BLASTed against TAIR       | 56,604                     | 45.56     |
| Unigenes BLASTed against COG        | 16,019                     | 12.89     |
| Unigenes BLASTed against GO         | 44,814                     | 36.07     |
| All annotated unigenes              | 68,695                     | 55.30     |

**Table S3.** Comparison of terpene biosynthetic genes of *Lavandula pubescens* with orthologous genes and proteins showing the highest identity

| Genes   | Orthologous genes<br>(Accession no.)                            | Identity<br>(%) | Orthologous proteins<br>(Accession no.)        | Identity<br>(%) |
|---------|-----------------------------------------------------------------|-----------------|------------------------------------------------|-----------------|
| LpDXS2  | <i>Lavandula angustifolia</i> (JX630150.1)                      | 86              | <i>Lavandula angustifolia</i> (AGQ04154.1)     | 87              |
|         | <i>Isodon rubescens</i> (KT831764.1)                            | 81              | <i>Isodon rubescens</i> (AMM72794.1)           | 85              |
|         | <i>Prunella vulgaris</i> (MK272806.1)                           | 82              | <i>Plectranthus barbatus</i> (ALE19960.1)      | 85              |
| LpMCT   | <i>Isodon rubescens</i> (MK192294.1)                            | 93              | <i>Isodon rubescens</i> (QCZ24926.1)           | 96              |
|         | <i>Prunella vulgaris</i> (MK272812.1)                           | 87              | <i>Salvia miltiorrhiza</i> (AEZ55666.1)        | 92              |
|         | <i>Pogostemon cablin</i> (KF926080.1)                           | 86              | <i>Prunella vulgaris</i> (QEV81819.1)          | 91              |
| LpMCS   | <i>Isodon rubescens</i> (KT948057.1)                            | 92              | <i>Salvia miltiorrhiza</i> (AFQ95411.1)        | 83              |
|         | <i>Prunella vulgaris</i> (MK272815.1)                           | 89              | <i>Isodon rubescens</i> (AMW77341.1)           | 81              |
|         | <i>Plectranthus barbatus</i> (KF749265.1)                       | 88              | <i>Phlomis umbrosa</i> (QEN91944.1)            | 76              |
| LpHDR   | <i>Lavandula angustifolia</i> (JX630153.1)                      | 90              | <i>Lavandula angustifolia</i> (AGQ04157.1)     | 94              |
|         | <i>Isodon rubescens</i> (KT948058.1)                            | 88              | <i>Isodon rubescens</i> (AMW77342.1)           | 89              |
|         | <i>Salvia miltiorrhiza</i> (JX233817.1)                         | 84              | <i>Salvia miltiorrhiza</i> (AEZ55670.1)        | 84              |
| LpIDI   | <i>Isodon rubescens</i> (KT948056.1)                            | 88              | <i>Salvia miltiorrhiza</i> (ABV08818.1)        | 94              |
|         | <i>Salvia miltiorrhiza</i> (EF635967.1)                         | 87              | <i>Prunella vulgaris</i> (QEV81828.1)          | 91              |
|         | <i>Prunella vulgaris</i> (MK272820.1)                           | 87              | <i>Scutellaria barbata</i> (QEY10174.1)        | 81              |
| LpAACT  | <i>Isodon rubescens</i> (KR154220.1)                            | 92              | <i>Isodon rubescens</i> (ALG00700.1)           | 93              |
|         | <i>Prunella vulgaris</i> (MK272796.1)                           | 89              | <i>Prunella vulgaris</i> (QEV81803.1)          | 91              |
|         | <i>Scutellaria barbata</i> (MK035028.1)                         | 85              | <i>Sesamum indicum</i> (XP_011095902.1)        | 88              |
| LpHMGS  | <i>Lavandula angustifolia</i> (JX630154.1)                      | 92              | <i>Lavandula angustifolia</i> (AGQ04158.1)     | 98              |
|         | <i>Isodon rubescens</i> (KX151718.1)                            | 90              | <i>Isodon rubescens</i> (ANW07497.1)           | 97              |
|         | <i>Salvia miltiorrhiza</i> (FJ785326.1)                         | 87              | <i>Salvia miltiorrhiza</i> (ACV65039.1)        | 92              |
| LpHMGR  | <i>Lavandula angustifolia</i> (JX630155.1)                      | 86              | <i>Lavandula angustifolia</i> (AGQ04159.1)     | 93              |
|         | <i>Salvia miltiorrhiza</i> (JN831102.1)                         | 82              | <i>Prunella vulgaris</i> (QEV81808.1)          | 86              |
|         | <i>Osmanthus fragrans</i> (KY451762.1)                          | 79              | <i>Sesamum indicum</i> (XP_011095902.1)        | 84              |
| LpMVK   | PREDICTED: <i>Ananas comosus</i> transcript X1 (XM_020245820.1) | 73              | <i>Salvia miltiorrhiza</i> (AEZ55674.1)        | 92              |
|         | PREDICTED: <i>Ananas comosus</i> transcript X2 (XM_020245821.1) | 73              | <i>Prunella vulgaris</i> (QEV81809.1)          | 91              |
|         | PREDICTED: <i>Ananas comosus</i> transcript X3 (XM_020245822.1) | 73              | <i>Picrorhiza kurroa</i> (AGS18028.1)          | 86              |
| LpPMK   | <i>Scutellaria barbata</i> (MK035034.1)                         | 85              | <i>Salvia miltiorrhiza</i> (AEZ55665.1)        | 86              |
|         | <i>Prunella vulgaris</i> (MK272803.1)                           | 85              | <i>Scutellaria barbata</i> (QEY10159.1)        | 82              |
|         | <i>Osmanthus fragrans</i> (KY451764.1)                          | 77              | <i>Sesamum indicum</i> (XP_011074642.1)        | 81              |
| LpMVD   | <i>Isodon rubescens</i> (MK344321.1)                            | 93              | <i>Isodon rubescens</i> (QDQ03532.1)           | 96              |
|         | <i>Prunella vulgaris</i> (MK272804.1)                           | 91              | <i>Phlomis umbrosa</i> (APU50937.1)            | 94              |
|         | <i>Phlomis umbrosa</i> (KU317504.1)                             | 90              | <i>Scutellaria barbata</i> (QEY10160.1)        | 94              |
| LpGPPS  | <i>Salvia officinalis</i> (KY399788.1)                          | 84              | <i>Salvia officinalis</i> (KY399788.1)         | 89              |
|         | <i>Salvia miltiorrhiza</i> (JX090100.1)                         | 83              | <i>Pogostemon cablin</i> (AHK06506.1)          | 89              |
|         | <i>Lavandula x intermedia</i> (MN641908.1)                      | 82              | <i>Handroanthus impetiginosus</i> (PIN08988.1) | 87              |
| LpSQS   | <i>Prunella vulgaris</i> (MK272831.1)                           | 89              | <i>Prunella vulgaris</i> (QEV81838.1)          | 91              |
|         | <i>Osmanthus fragrans</i> (KY992860.1)                          | 84              | <i>Sesamum indicum</i> (XP_011092839.1)        | 92              |
|         | <i>Camellia oleifera</i> (JX914592.1)                           | 83              | <i>Phtheirospermum japonicum</i> (GFP85929.1)  | 88              |
| LpGGPPS | <i>Plectranthus barbatus</i> (KP889114.1)                       | 83              | <i>Salvia miltiorrhiza</i> (ACR19637.1)        | 86              |
|         | <i>Salvia sclarea</i> (MK442922.1)                              | 82              | <i>Plectranthus barbatus</i> (ALE19959.1)      | 89              |
|         | <i>Lavandula x intermedia</i> (MN064858.1)                      | 85              | <i>Salvia sclarea</i> (QEH04692.1)             | 86              |
| LpActin | <i>Lavandula angustifolia</i> (KY596032.1)                      | 90              | <i>Prunella vulgaris</i> (AHY94895.1)          | 99              |
|         | <i>Prunella vulgaris</i> (KJ010818.1)                           | 90              | <i>Striga asiatica</i> (AAC49652.1)            | 99              |

**Table S4.** Primers designed based on terpene biosynthetic gene sequences

| Genes          | Sequence of forward primer<br>(5'–3') | Sequence of reverse primer<br>(5'–3') | Amplicon<br>length<br>(bp <sup>1</sup> ) |
|----------------|---------------------------------------|---------------------------------------|------------------------------------------|
| <i>LpDXS</i>   | AGAGAGGGTGGCTCTACTGG                  | CCACCAACTGACCCTTCCTC                  | 195                                      |
| <i>LpMCT</i>   | AATTTGCATTGCCCCGGAAG                  | CCTAGTACAGCTGCACCGAC                  | 172                                      |
| <i>LpMCS</i>   | TCGACCTTCATCGACTCGAAC                 | TCGGTGTCTGGAAAGATCTGC                 | 175                                      |
| <i>LpHDR</i>   | ATCCTAGTTGTTGGCGGATGG                 | TGTCTCCACCAACTCACCATG                 | 159                                      |
| <i>LpIDI</i>   | CAAACACCTGCTGCAGTCATC                 | TGTAGAGCATACGCCCCAAAG                 | 165                                      |
| <i>LpAACT</i>  | GGTGTTTGTGCAGAGCTGTG                  | TGGCTTTCCTTGCTACCAG                   | 162                                      |
| <i>LpHMGS</i>  | TGACCCGAAGCAGATTGGAC                  | AATAGTGCTGCAGTCCCACC                  | 165                                      |
| <i>LpHMGR</i>  | CACAGTTGGAGGTGGGACTC                  | GCCGACATCAGAGAGAGCTC                  | 159                                      |
| <i>LpMVK</i>   | GCAGTGCCATGAATTCCGTC                  | TGGCTGACCCCCATTGATTG                  | 169                                      |
| <i>LpPMK</i>   | AGCCAATTGGGATCATGAGAGG                | ACGTTTCAAGGGCATTGAGG                  | 155                                      |
| <i>LpMVD</i>   | TGCTTGAGAGAACTCCGCTC                  | AAAACGAGGCATGCCAAACC                  | 170                                      |
| <i>LpGPPS</i>  | GGCGTTTCAGTTGATCGACG                  | TGCCGGATTATCGAAGCCTC                  | 172                                      |
| <i>LpSQS</i>   | CGTGAAAATGAGACGCGGTC                  | ATGCACCAGAGTCTCTGCAG                  | 188                                      |
| <i>LpGGPPS</i> | GTCGAGAAGTTGCGGGTTTTTC                | TTCTCCAATCCGAGCAGCTTC                 | 161                                      |
| <i>LpActin</i> | TGAGCCACACAGTCCCAATC                  | TCCCTCACAATTTCCCGCTC                  | 157                                      |

<sup>1</sup>bp, basepair
